# Supplementary material for: Direct transition-metal-free intramolecular C–O bond formation: synthesis of benzoxazole derivatives
Source: Royal Society of Chemistry journal article supplement (doi:10.1039/c0ob00454e), 2010-12-24

Direct Transition-Metal-Free Intramolecular C-O Bond Formation:

Synthesis of Benzoxazole Derivatives

Jinsong Peng<sup>\*</sup>, Cuijuan Zong, Min Ye, Donghui Chen, Dewei Gao, Yufeng Wang,

Chunxia Chen<sup>\*</sup>

*Department of Chemistry and Chemical Engineering, College of Science, Northeast*

*Forestry University, Harbin, 150040, P. R. China.*

jspeng1998@163.com, ccx1759@163.com

<sup>\*</sup>To whom correspondence should be addressed

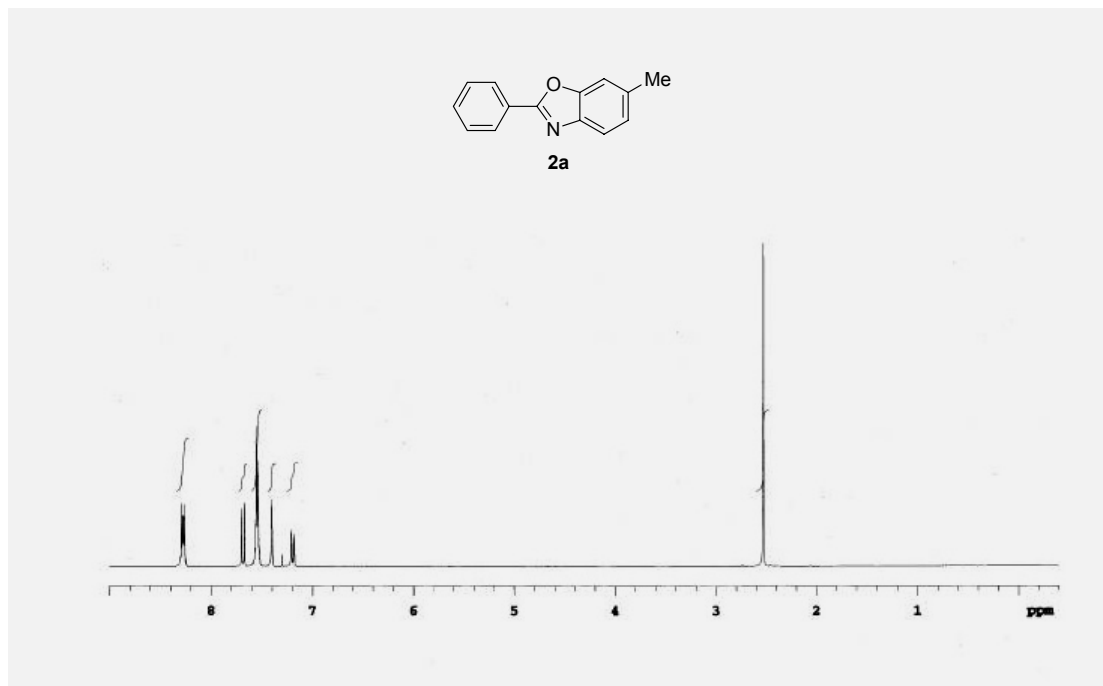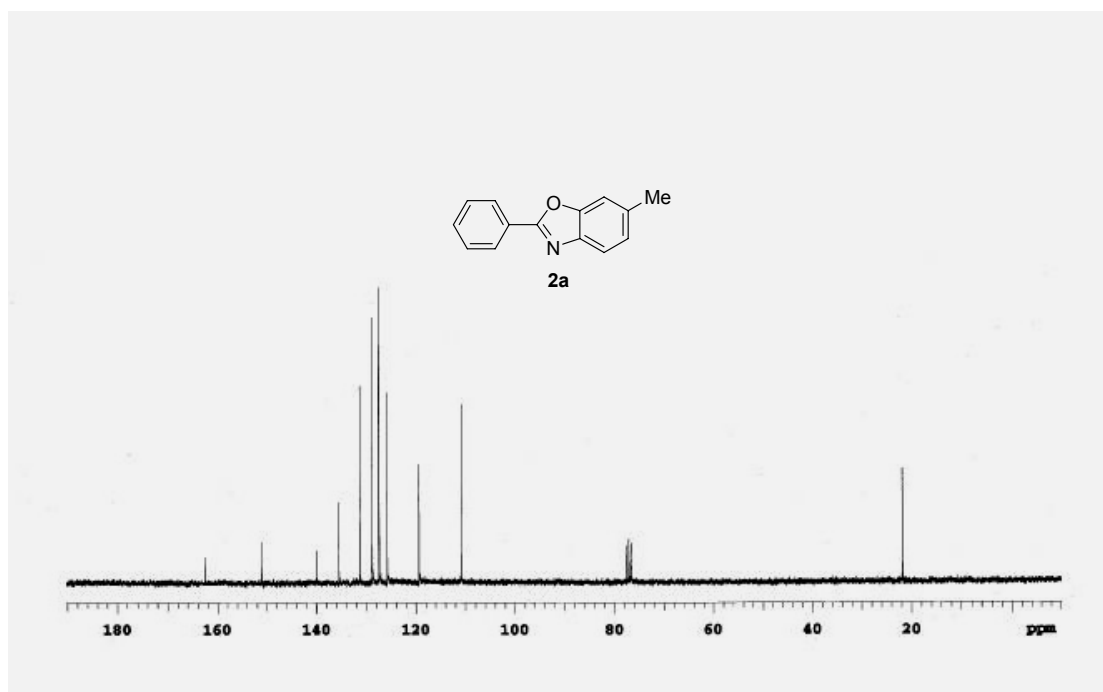

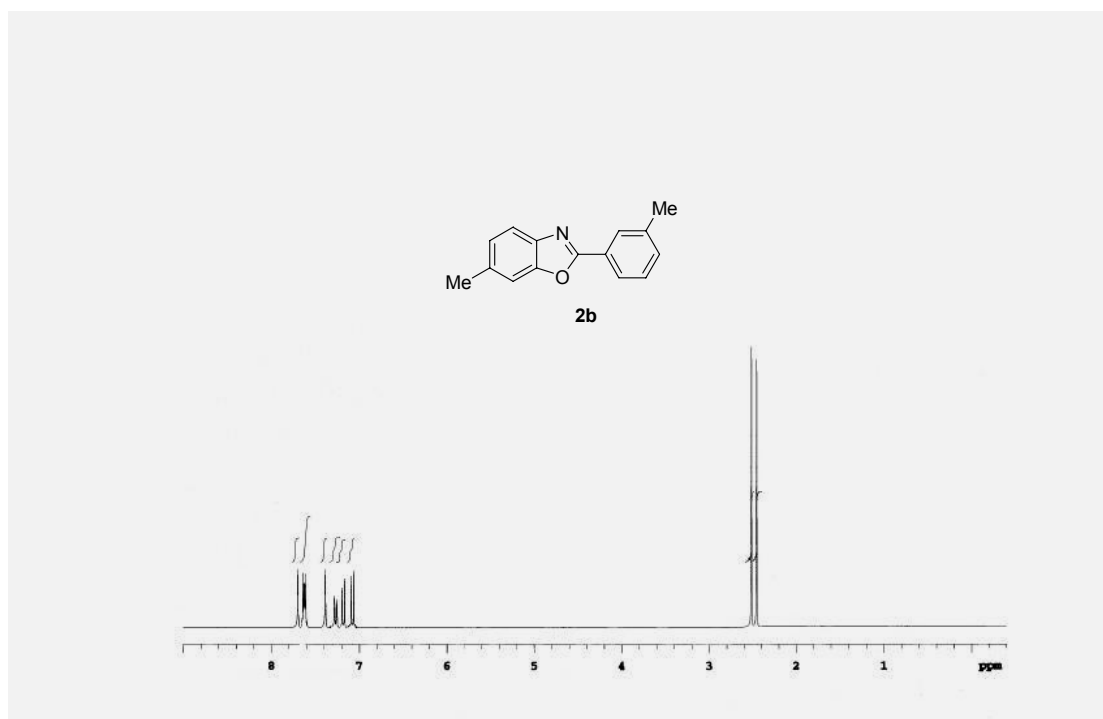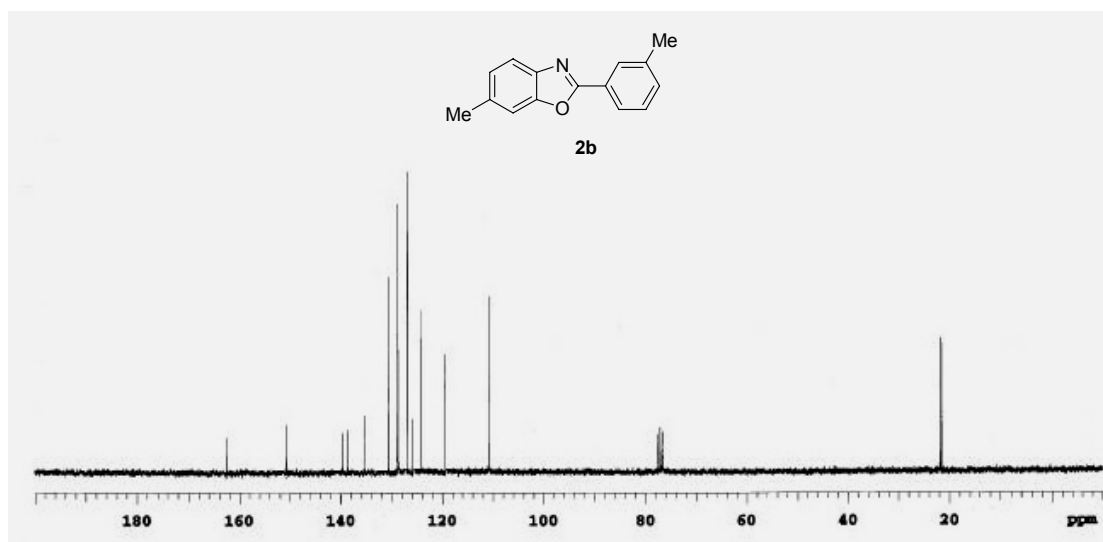

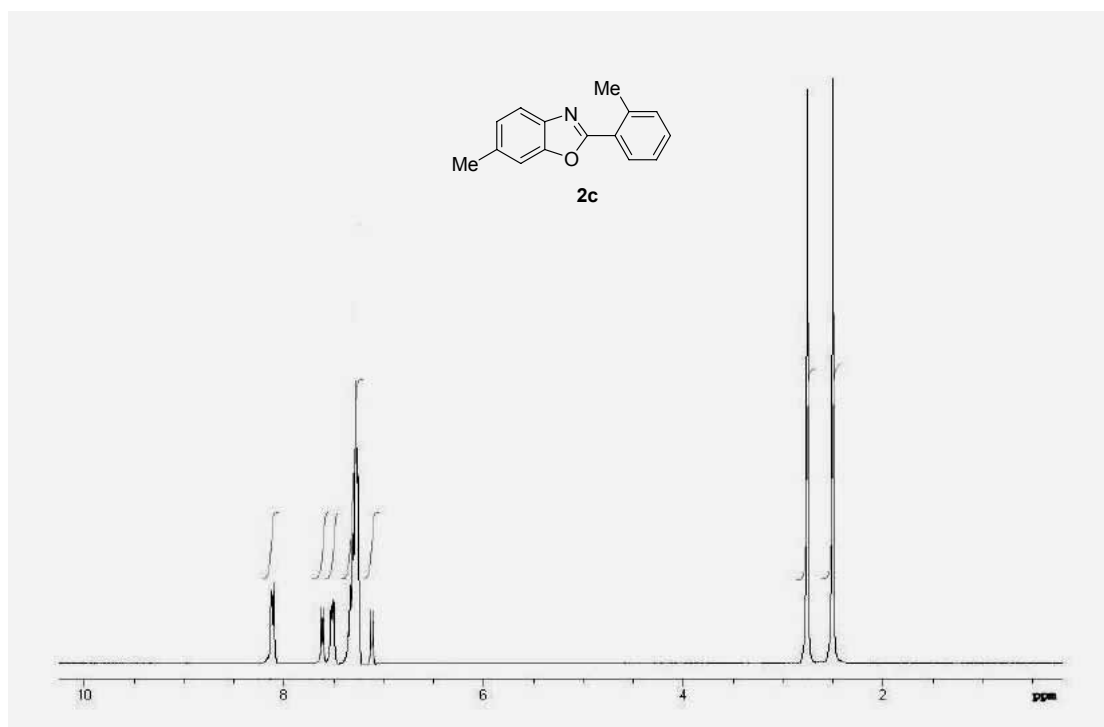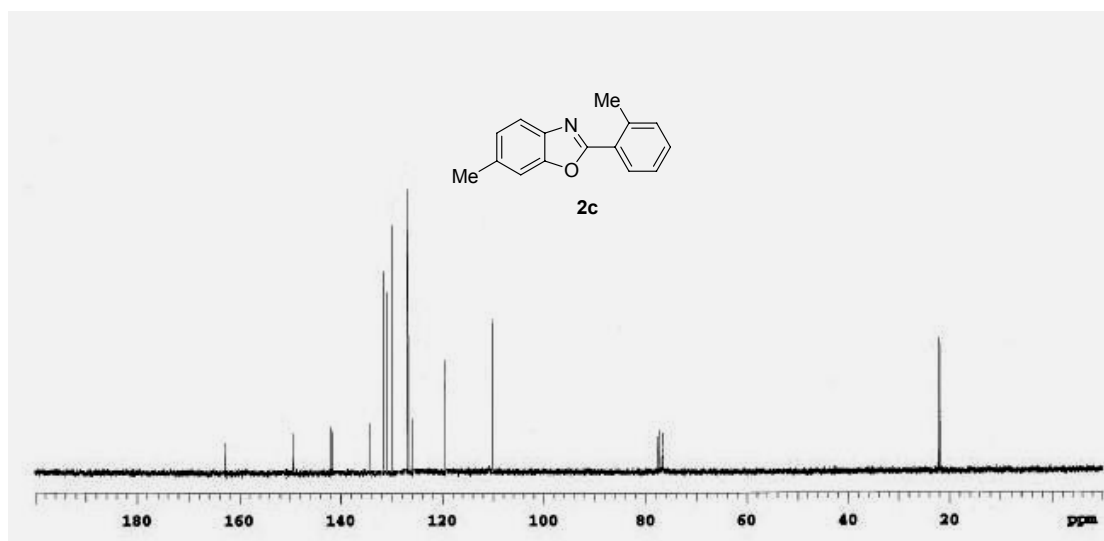

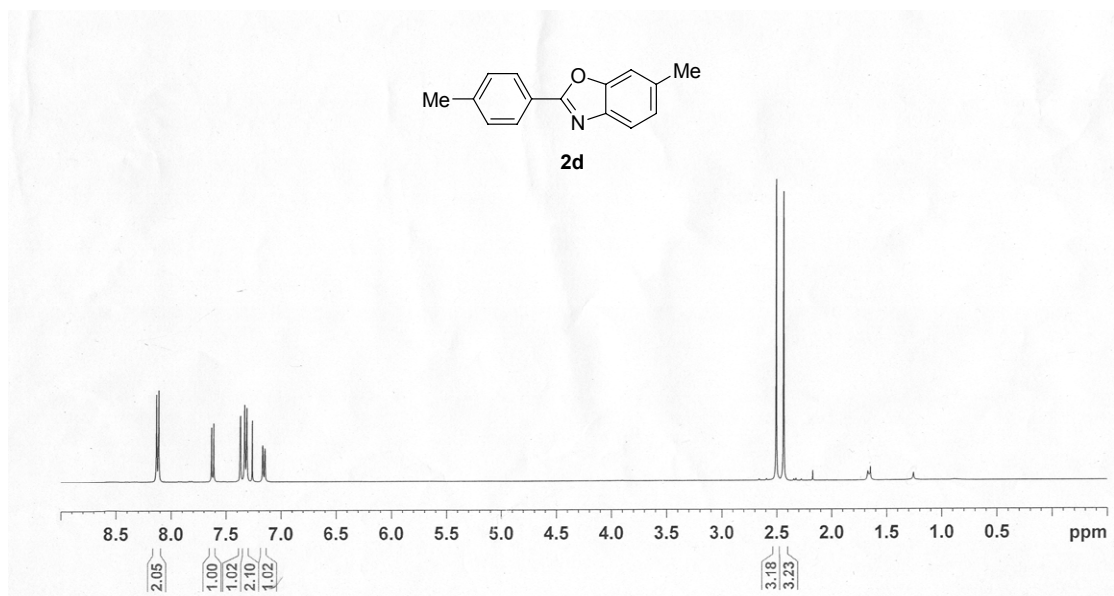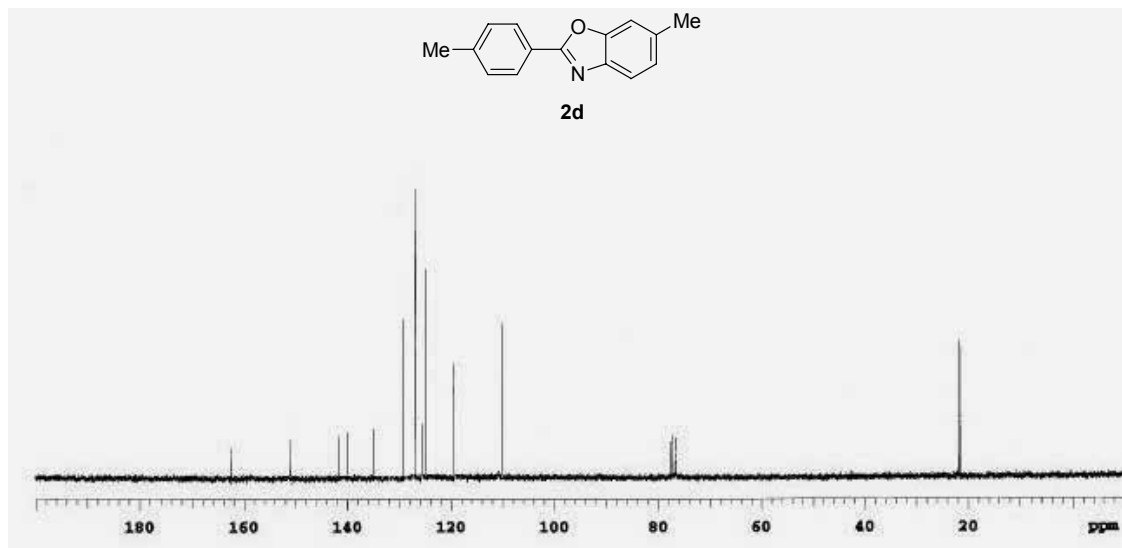

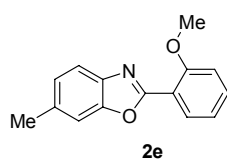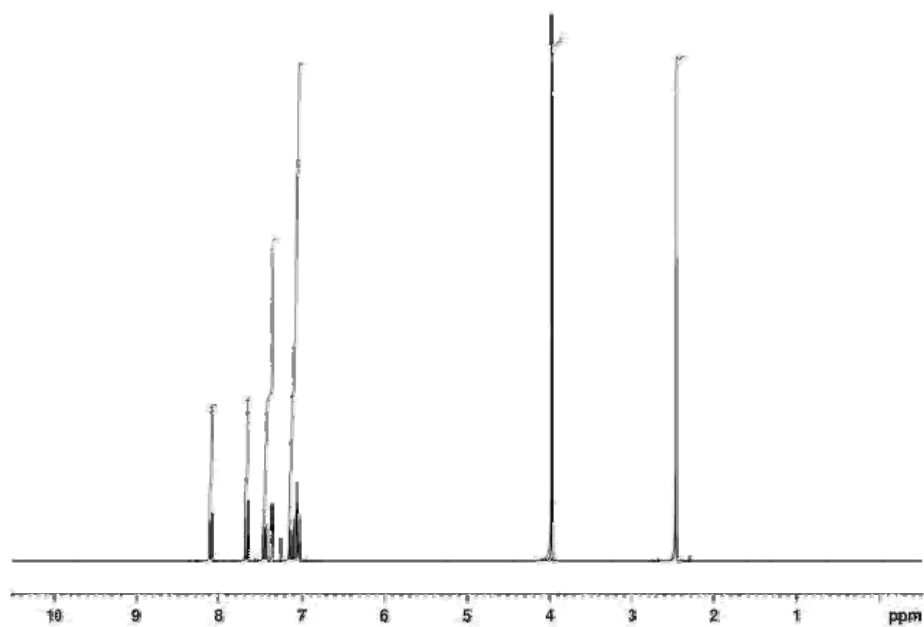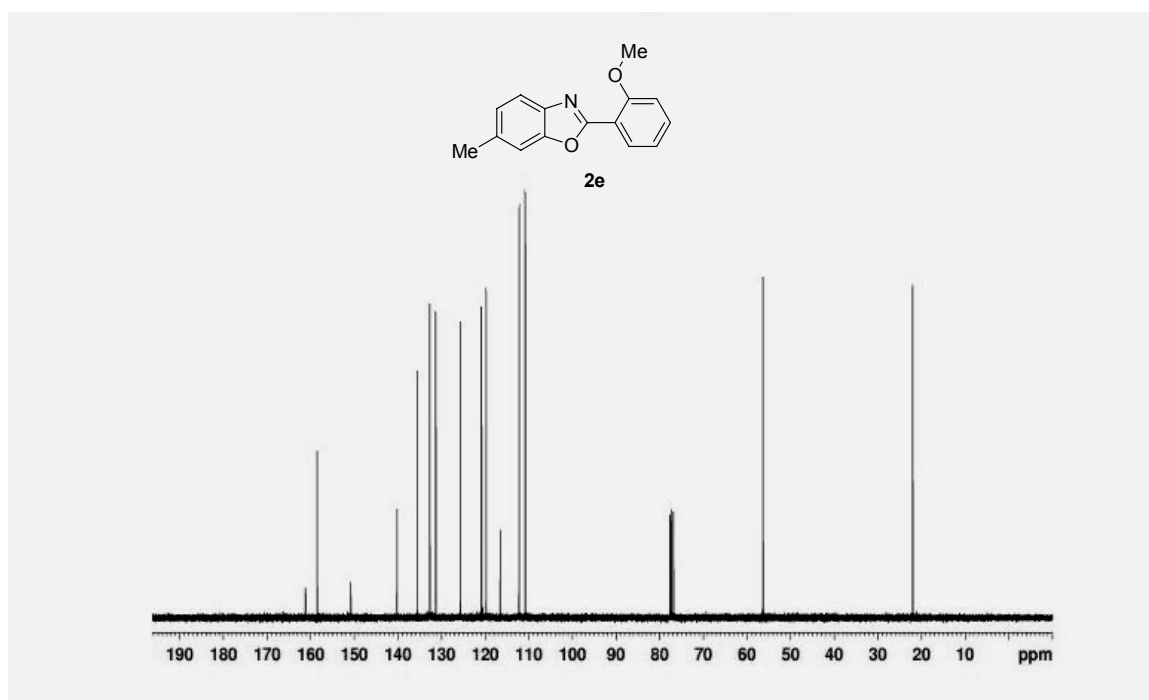

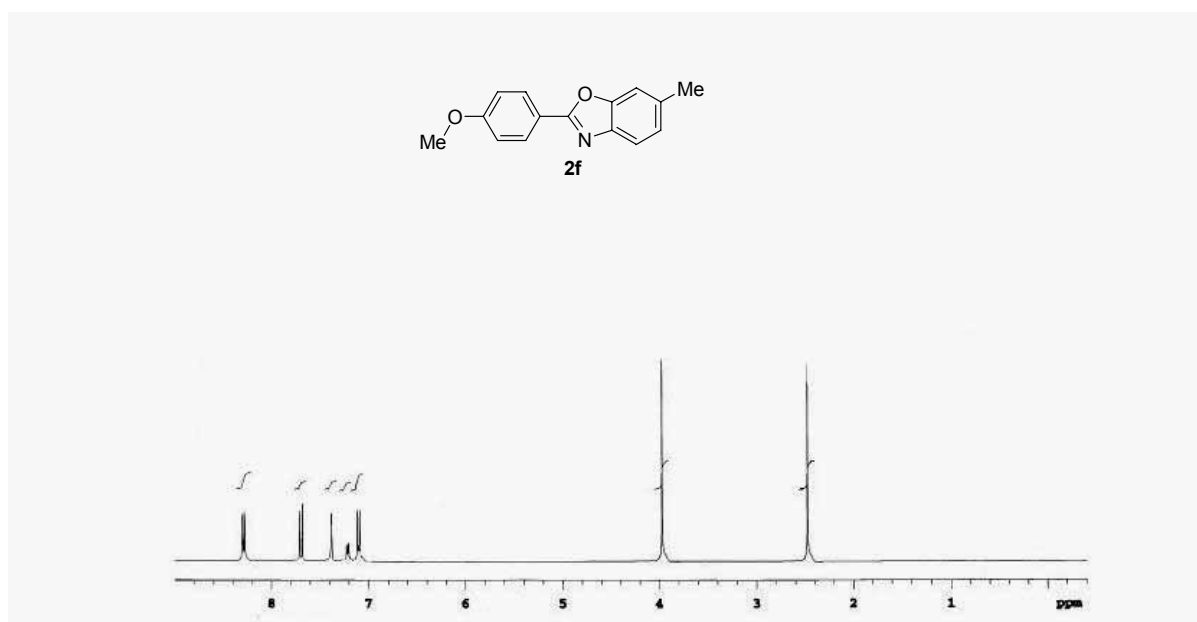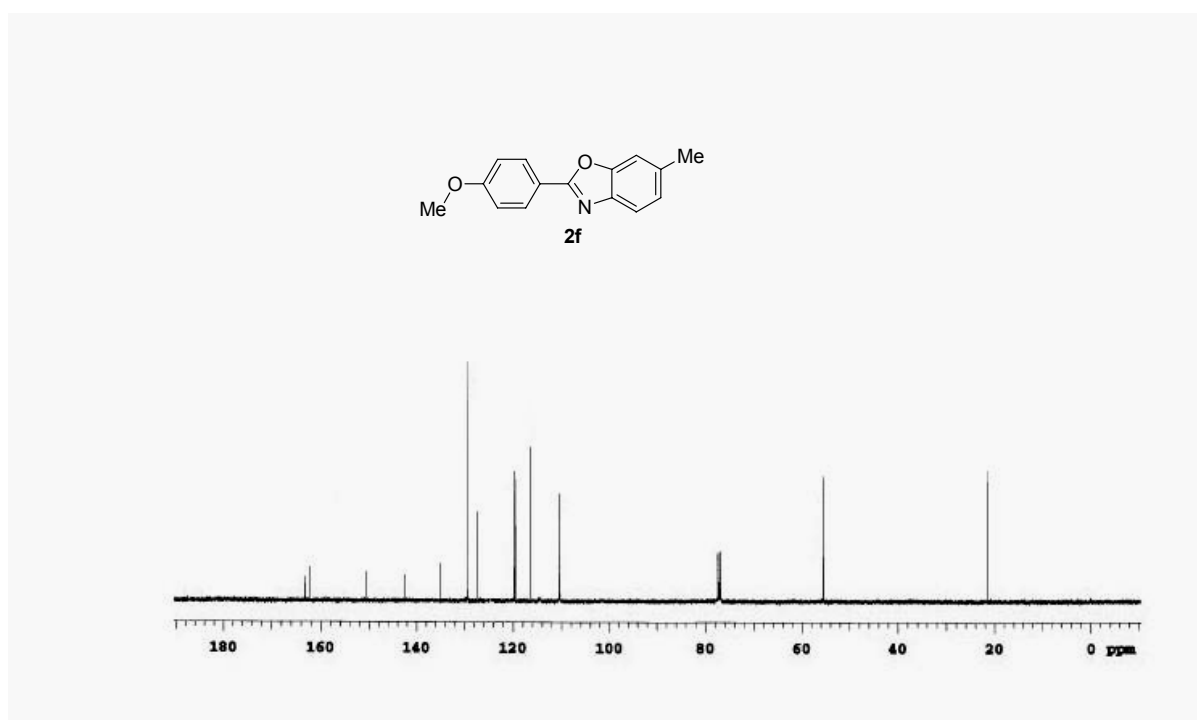

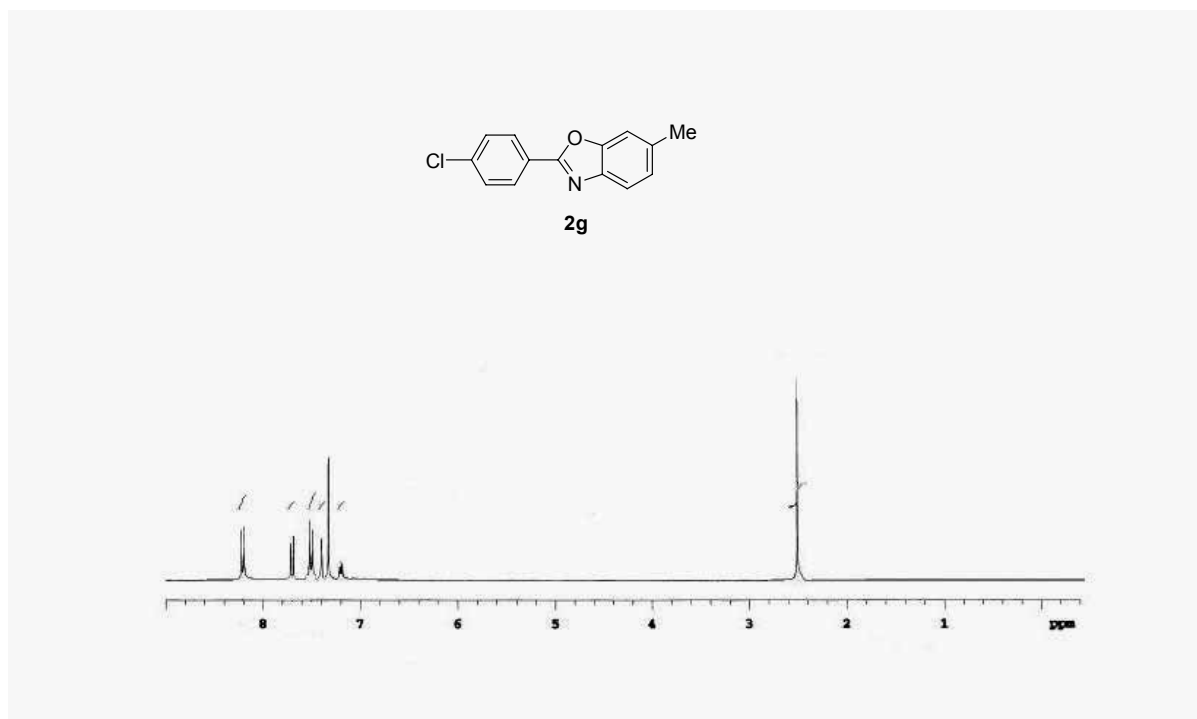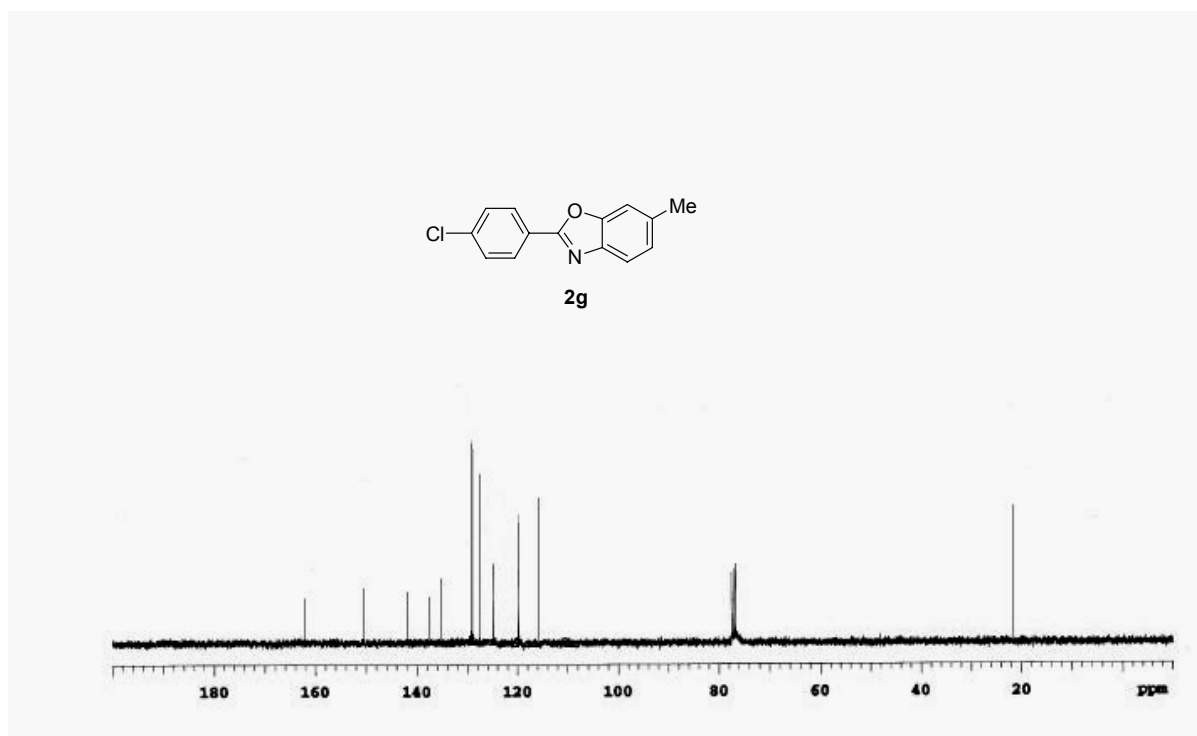



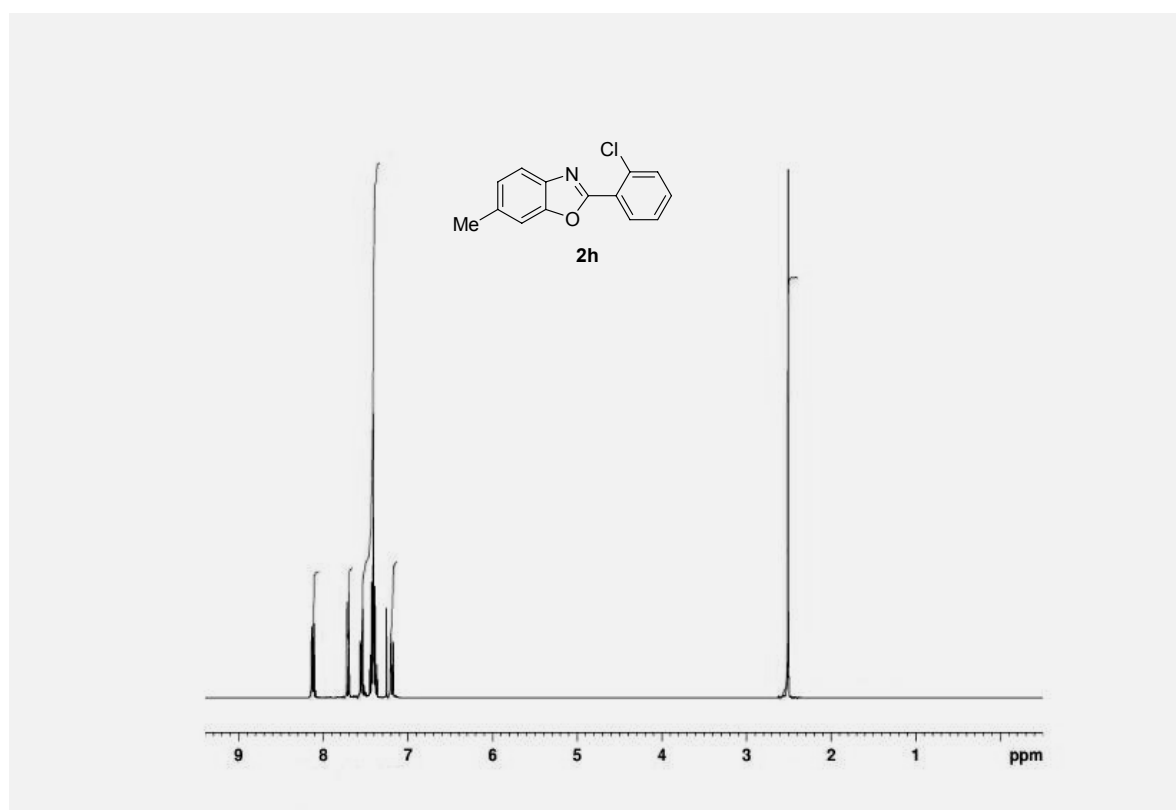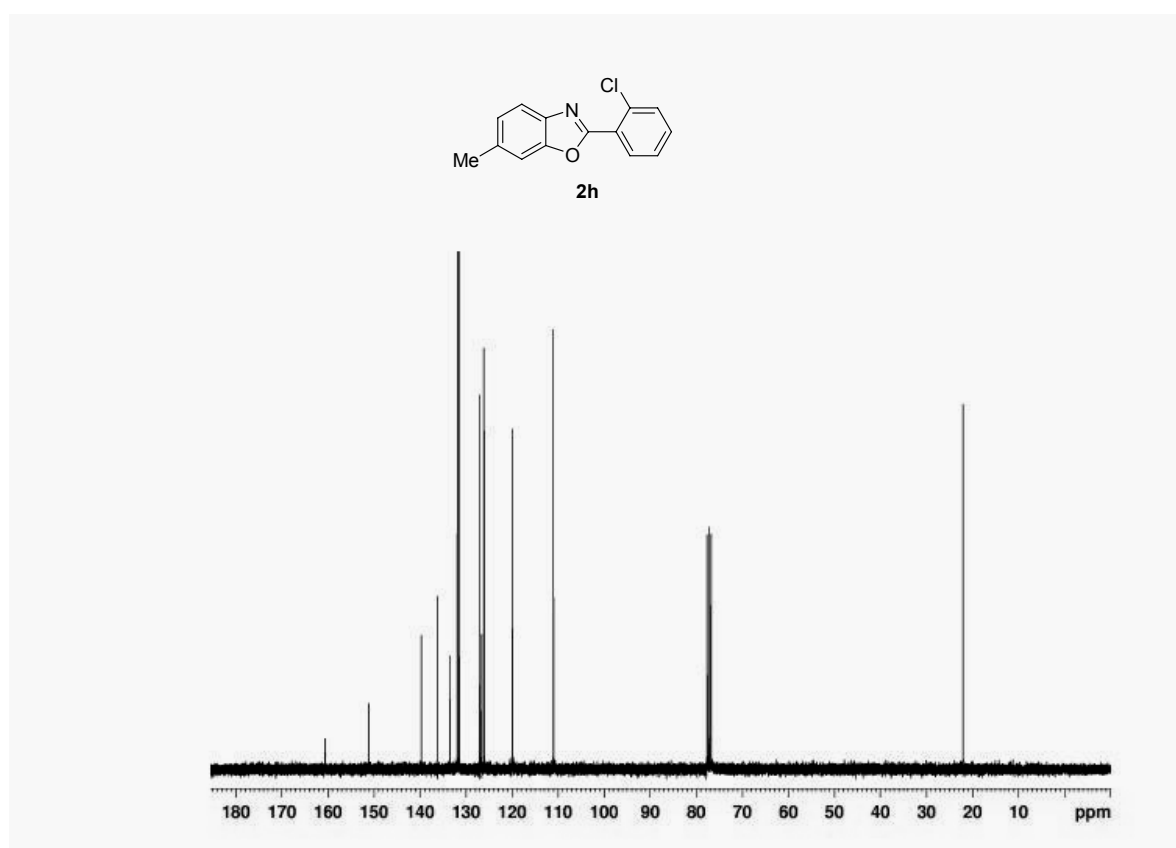

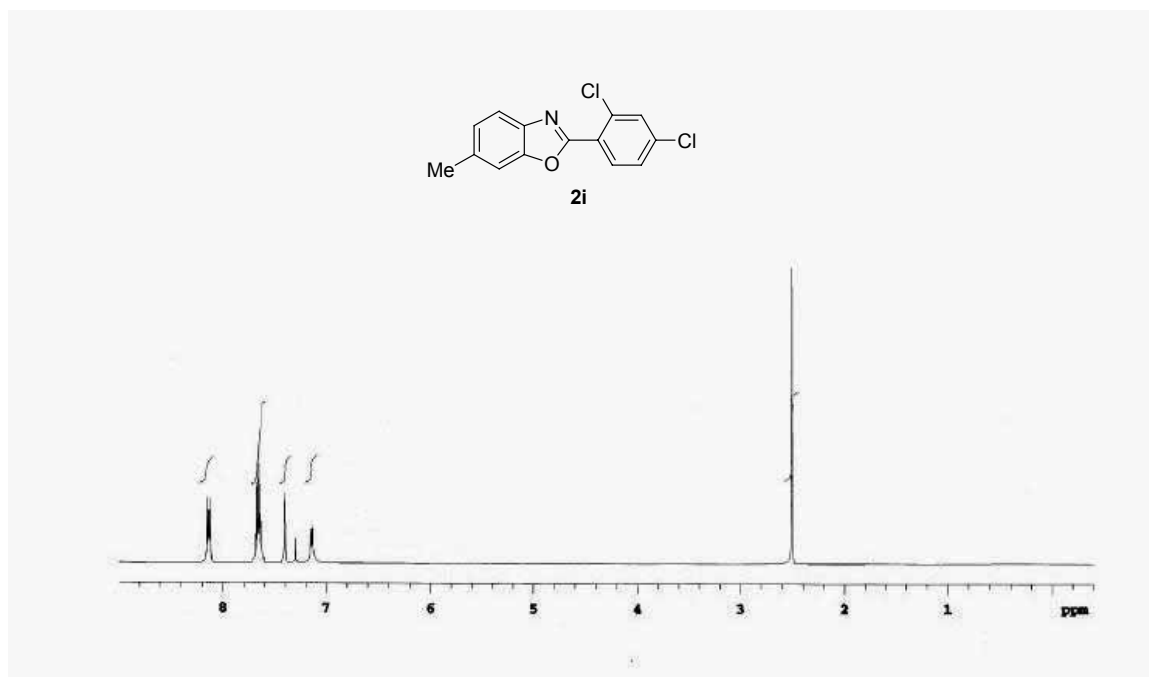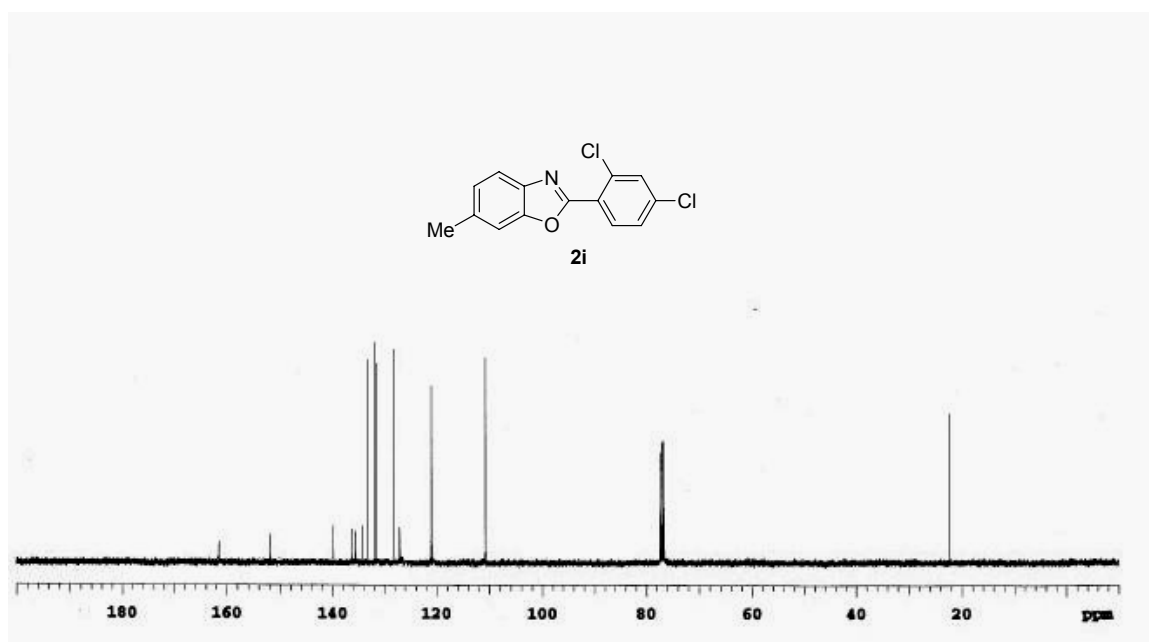

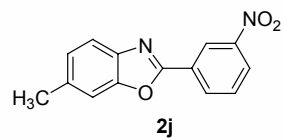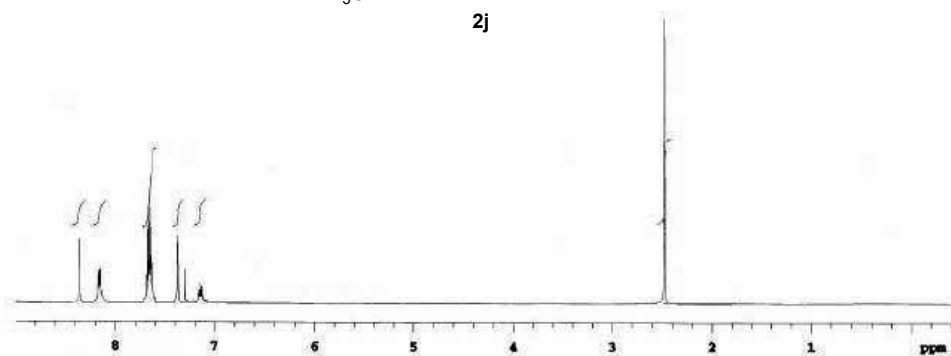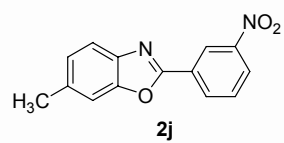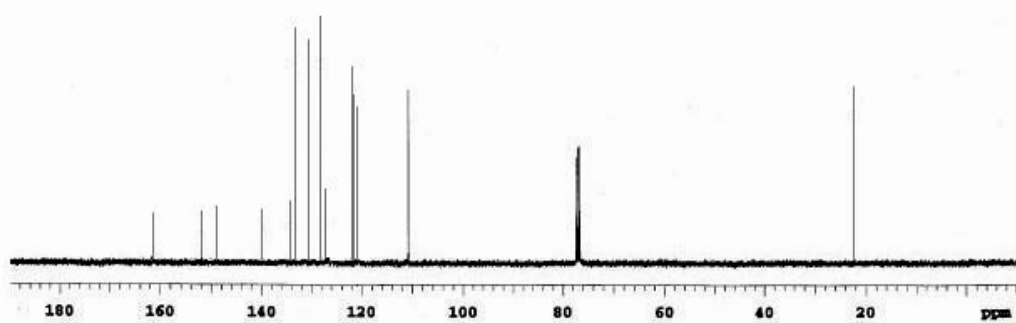

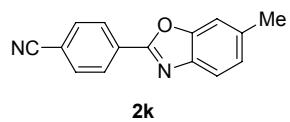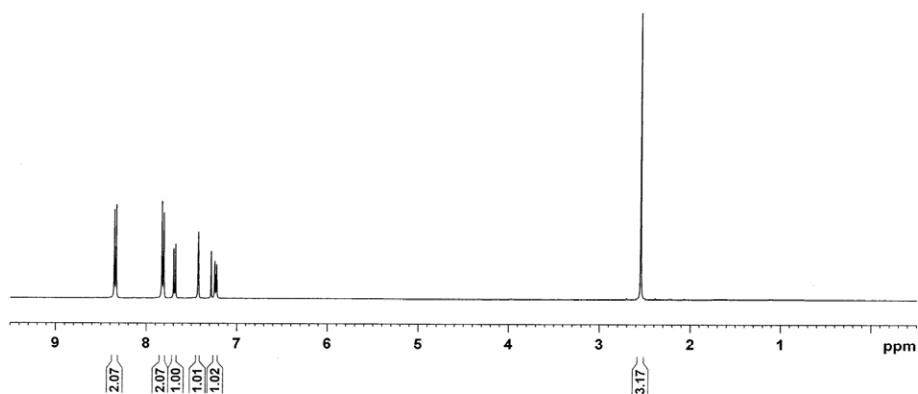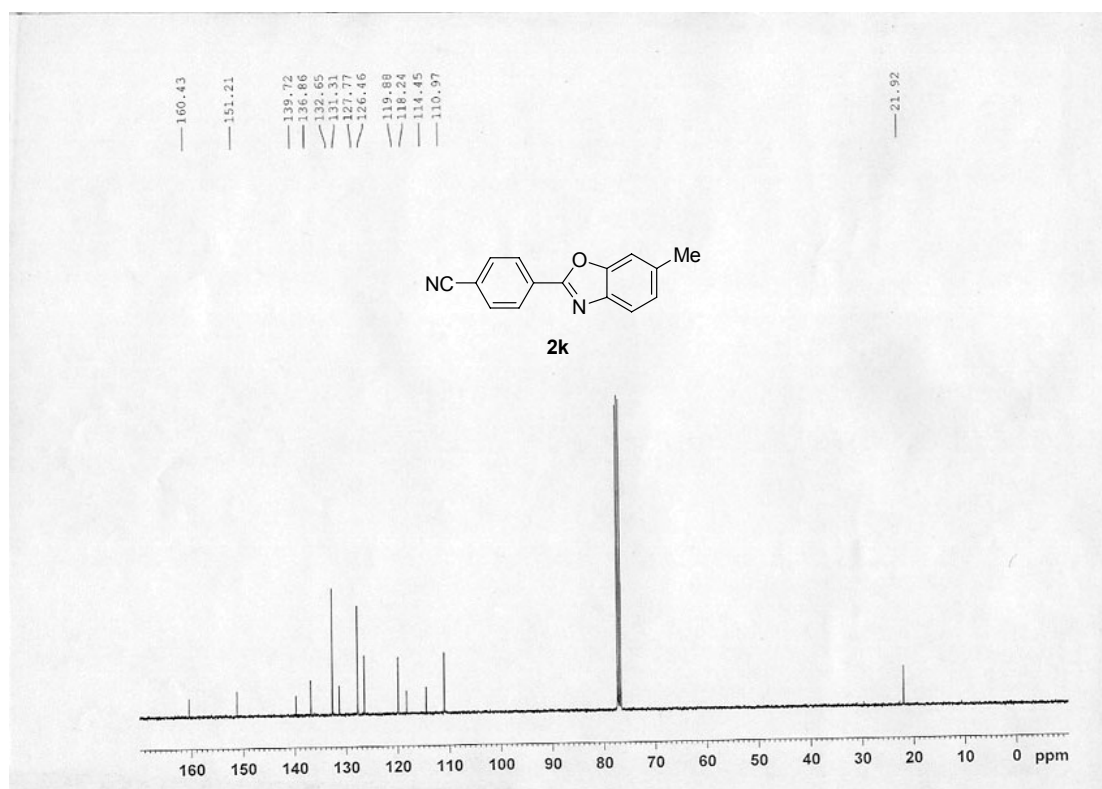

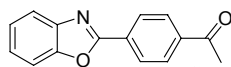

2I

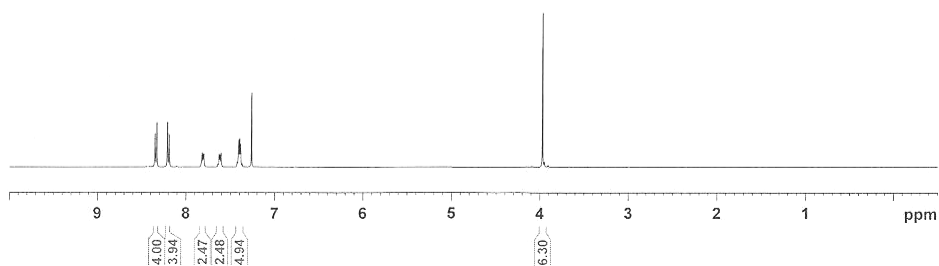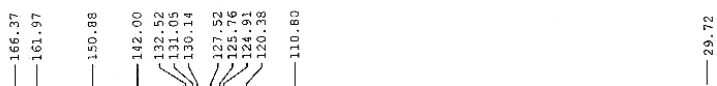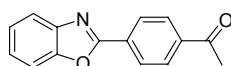

2I

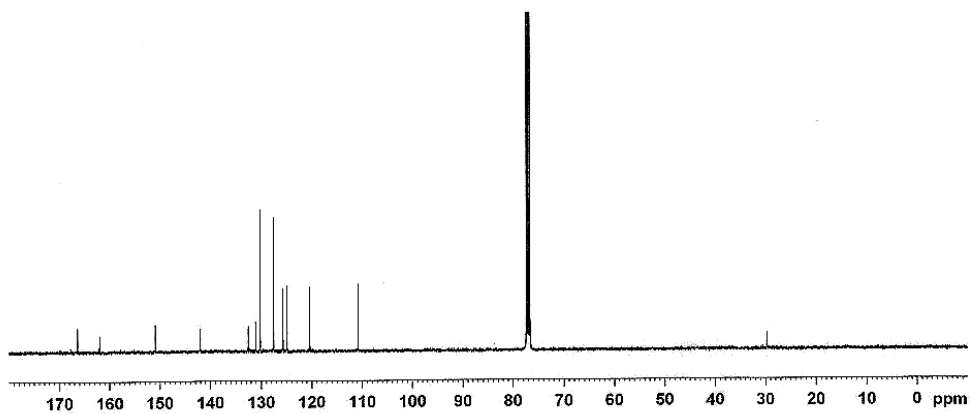

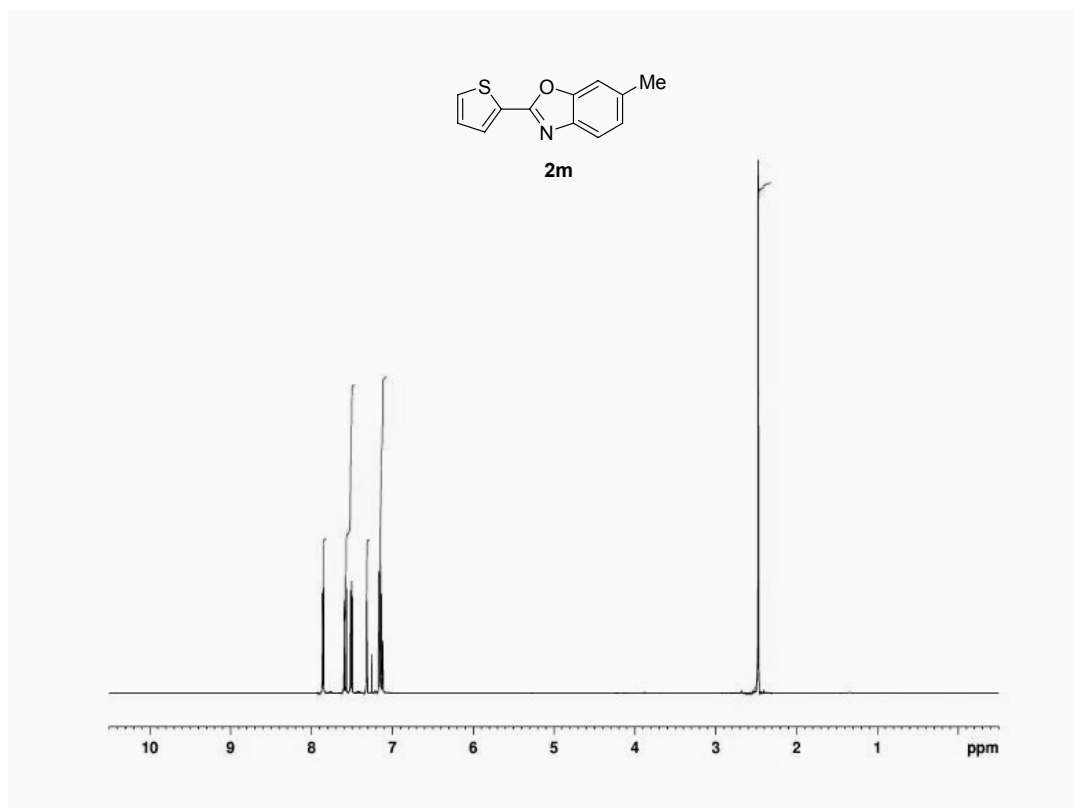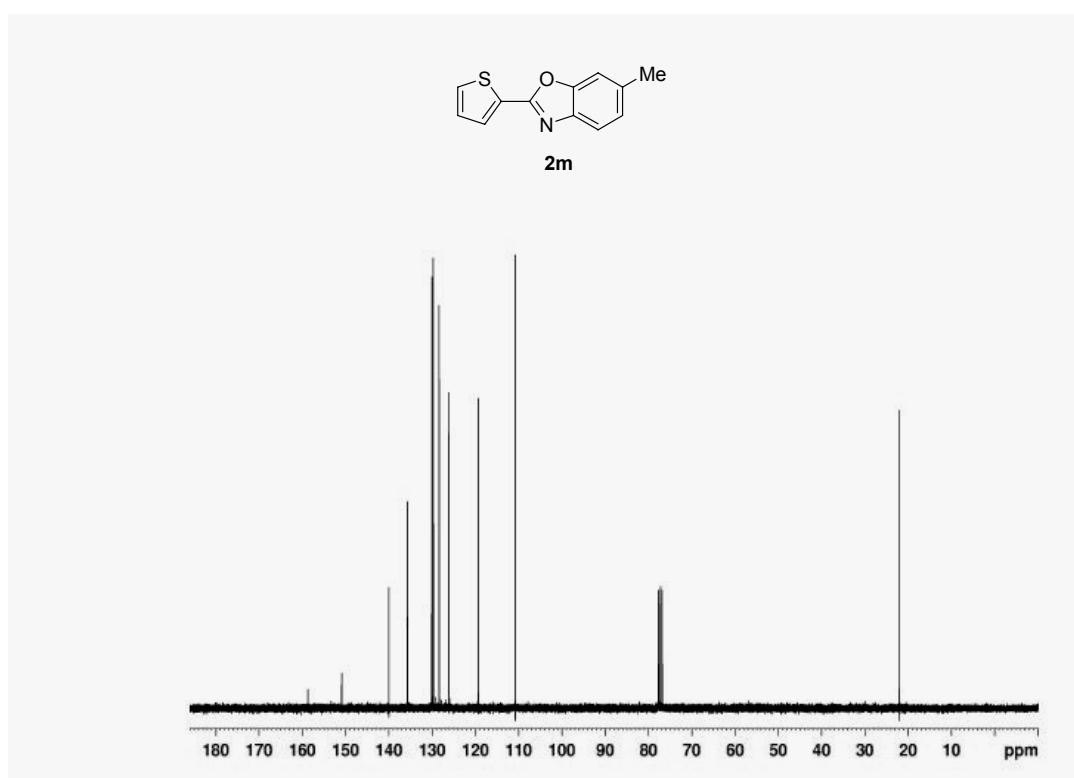

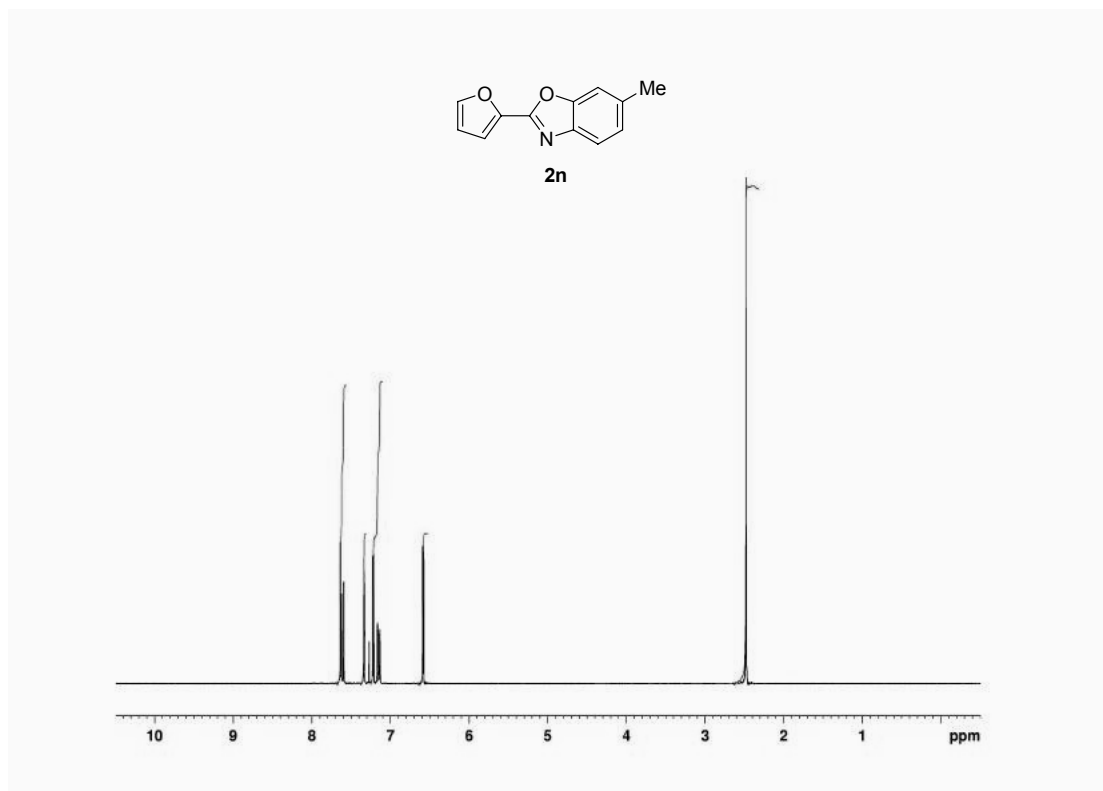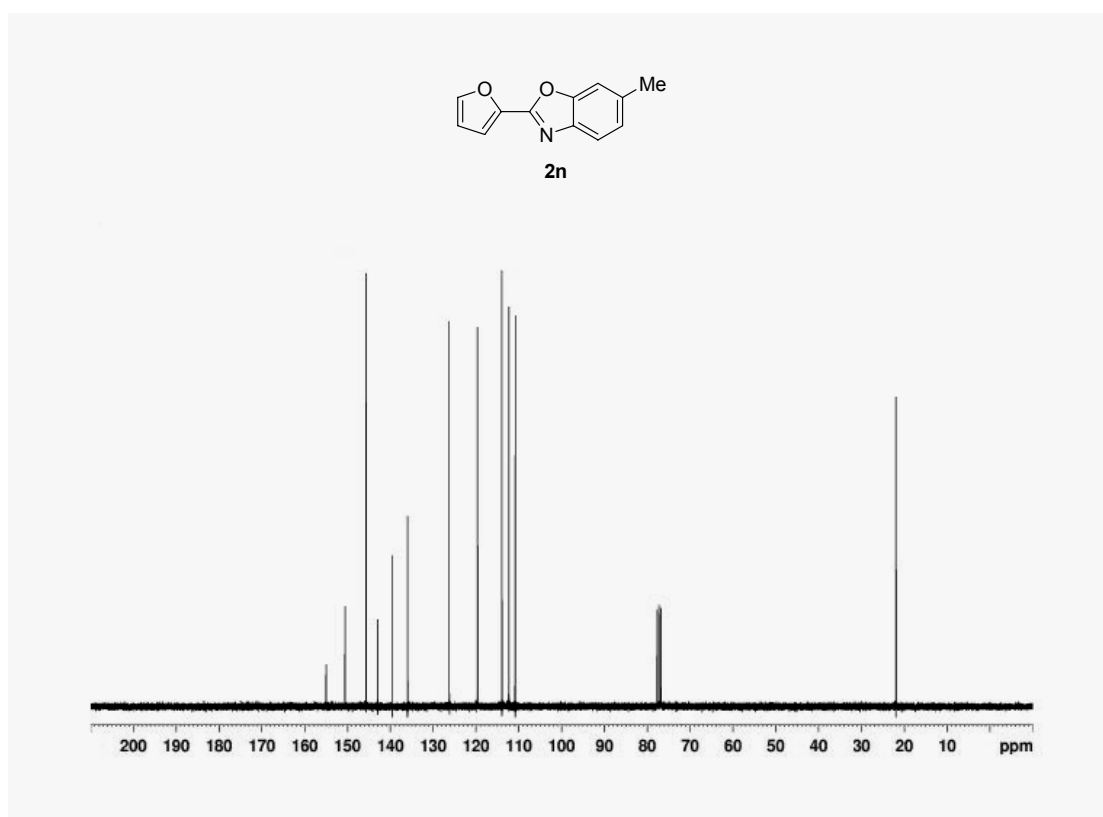

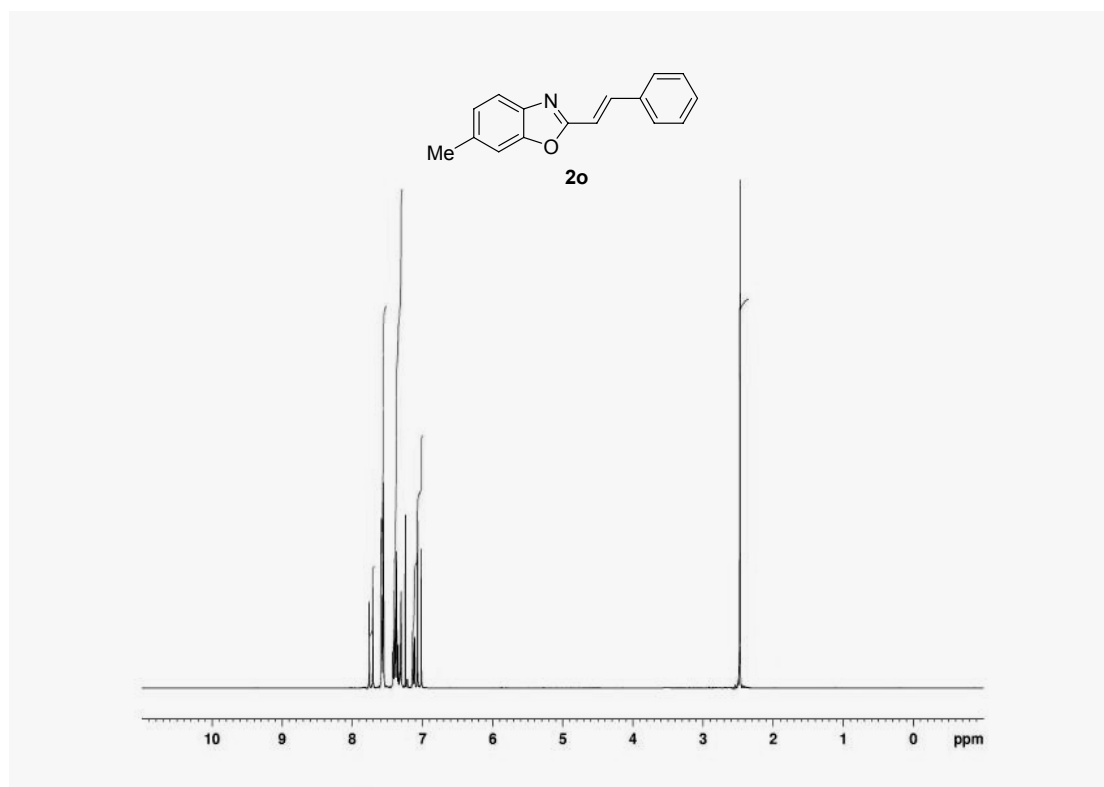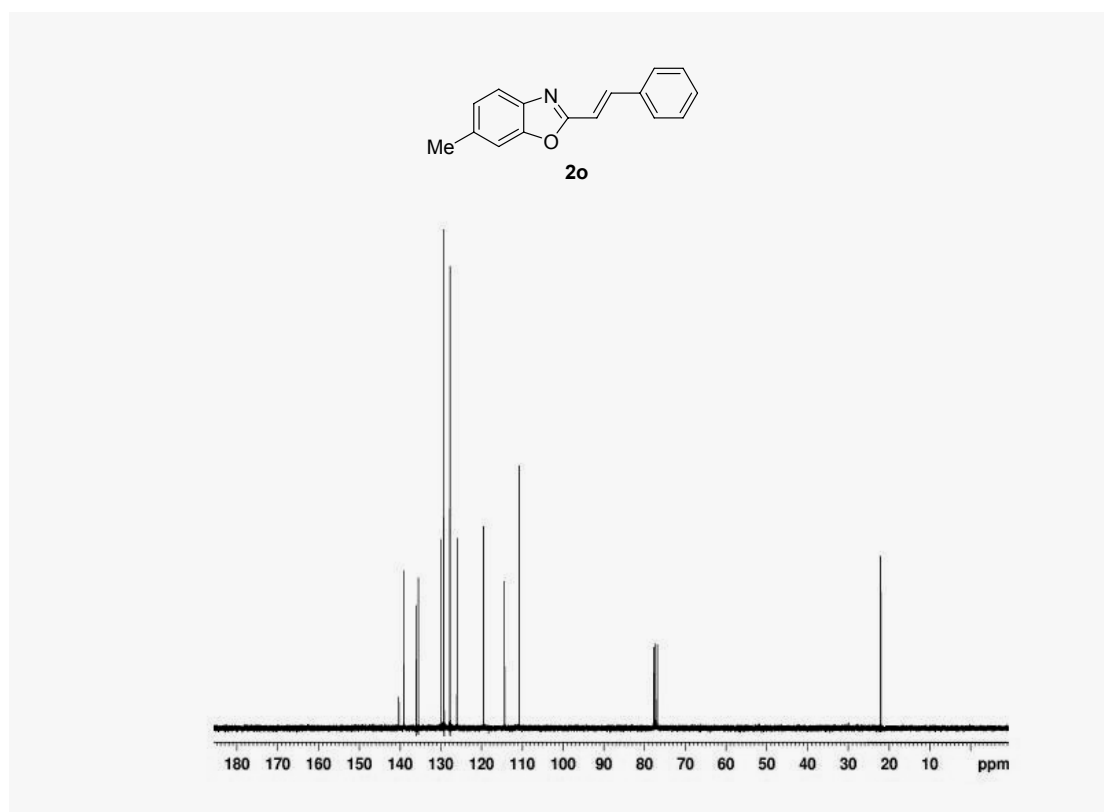



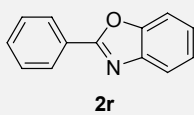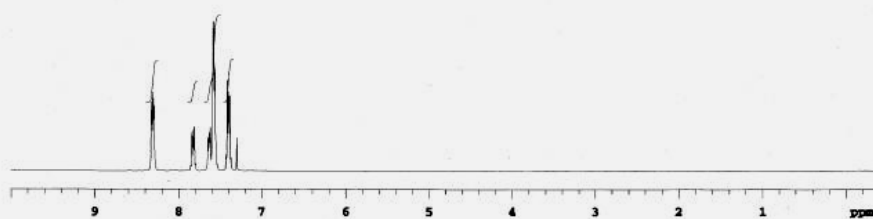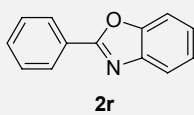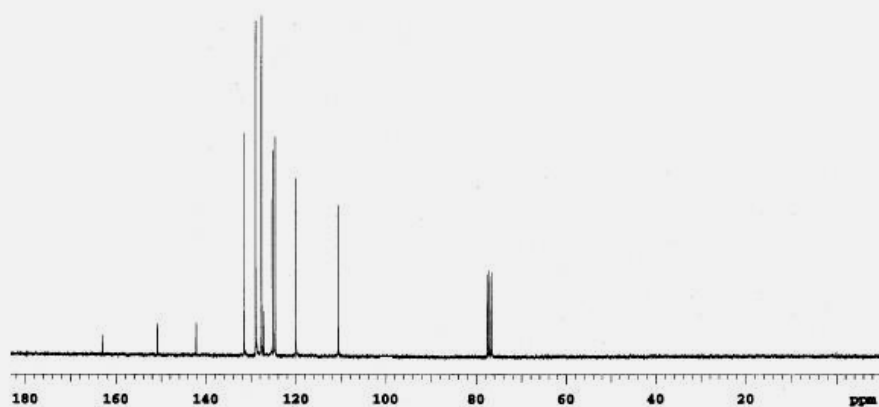

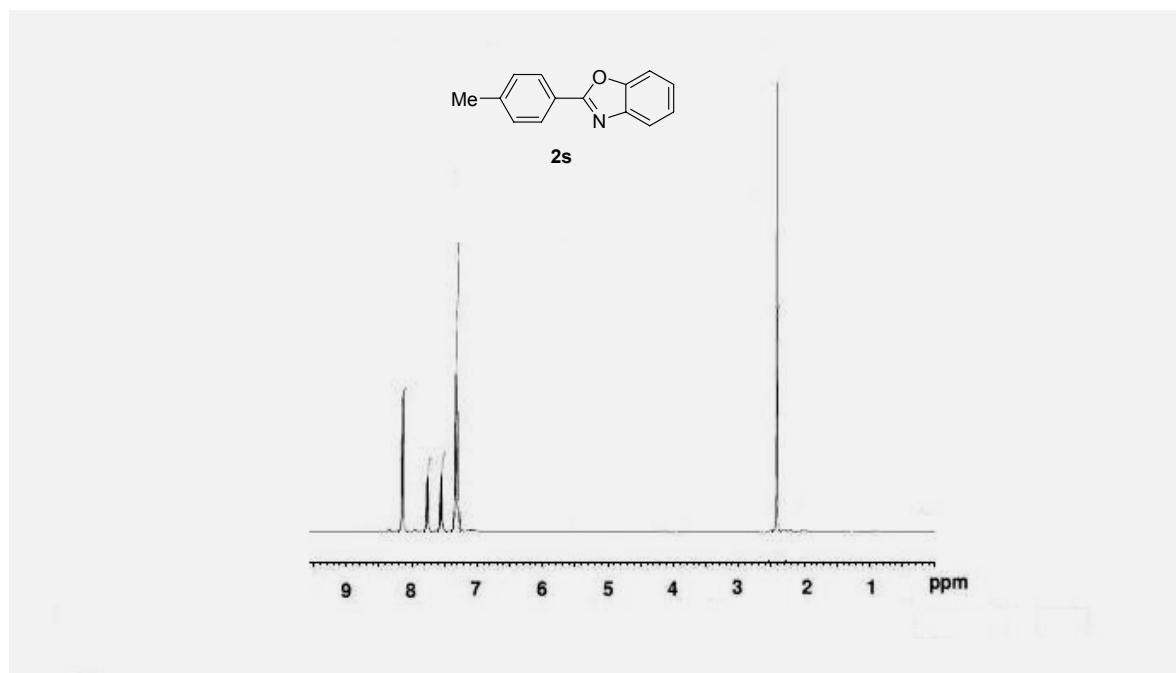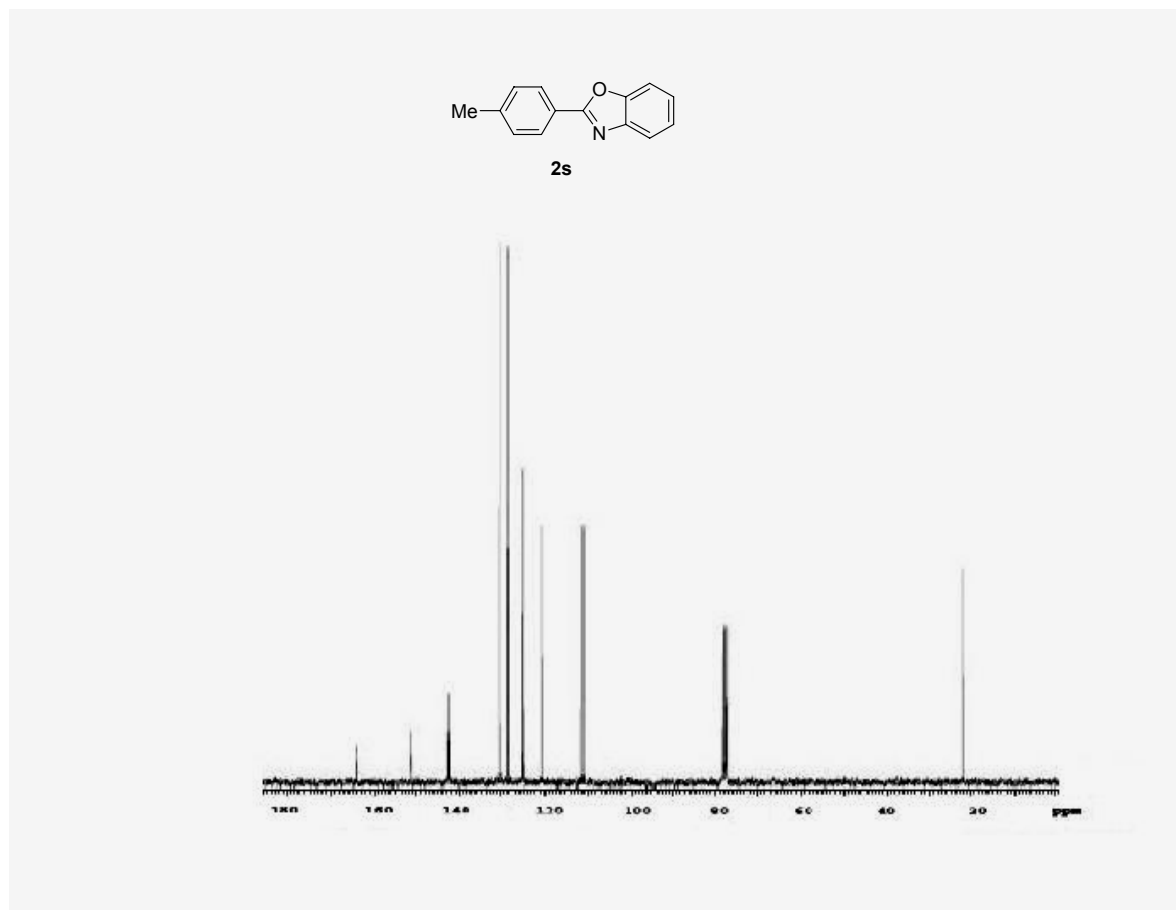

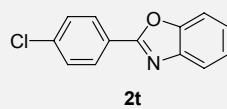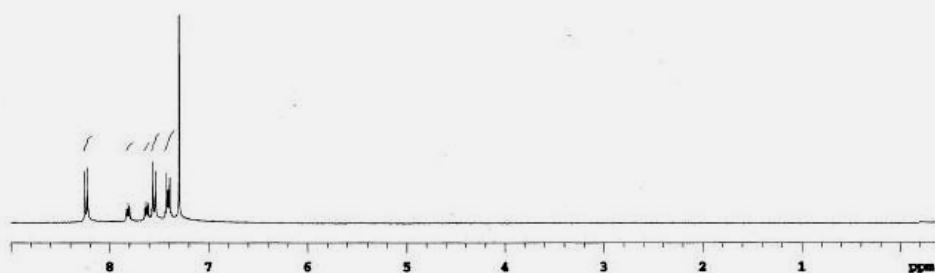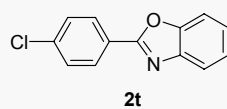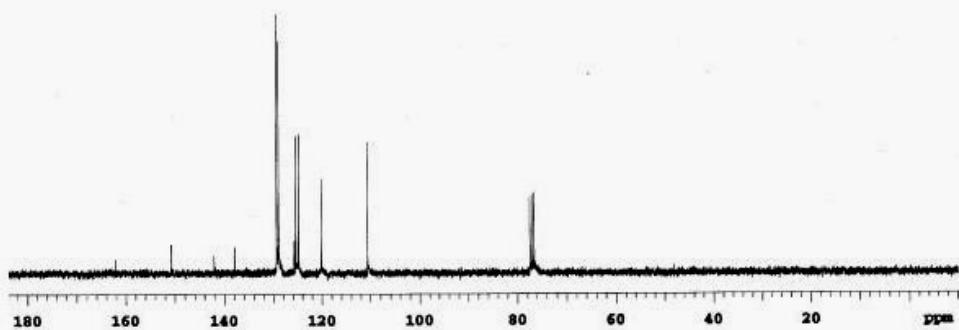

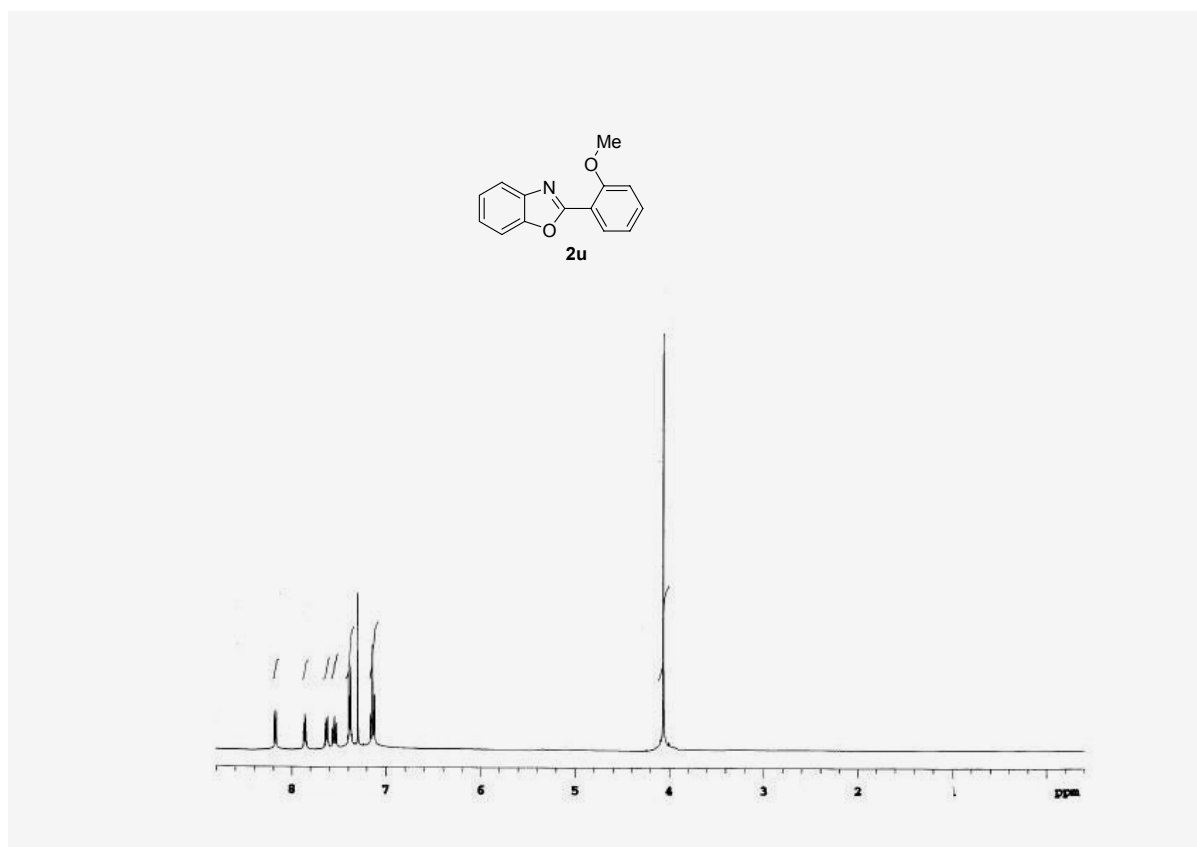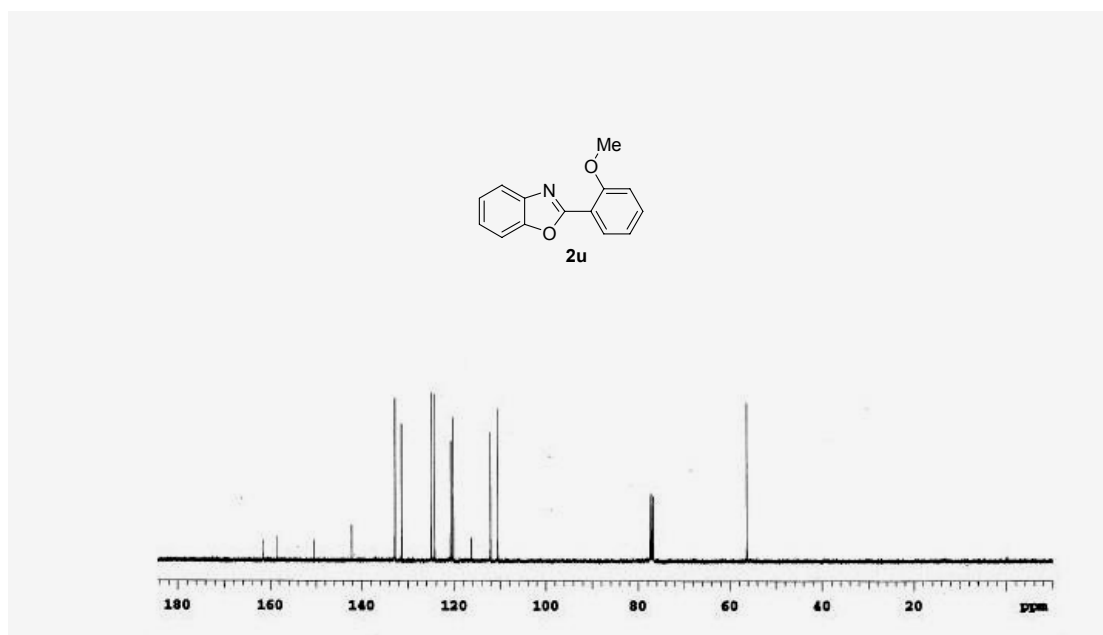

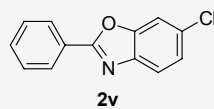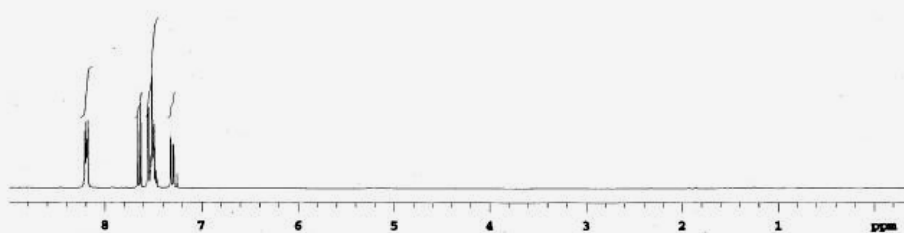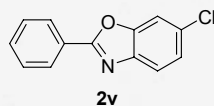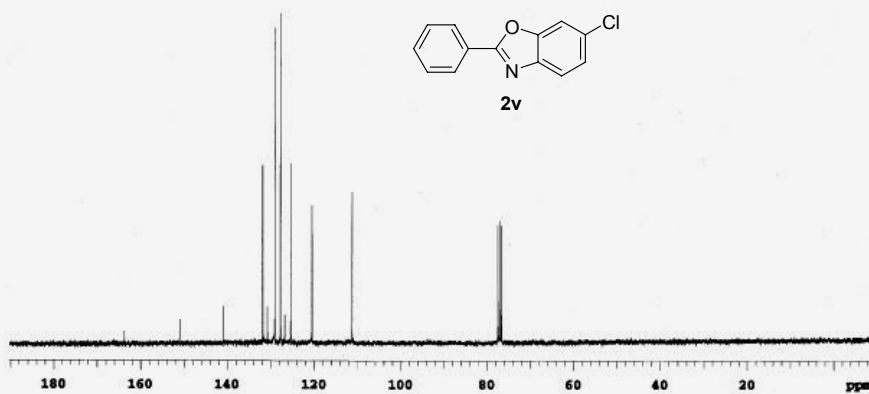

Supplement: c0ob00454e.pdf [file c0ob00454e.pdf]
